# Supplementary material for: Relationship between duty factor and external forces in slow recreational runners
Source: HighWire-hosted journal article supplement (doi:10.1136/bmjsem-2020-000996), 2021-03-01
Supplement: bmjsem-2020-000996supp001_data_supplement.pdf [file bmjsem-2020-000996supp001_data_supplement.pdf]

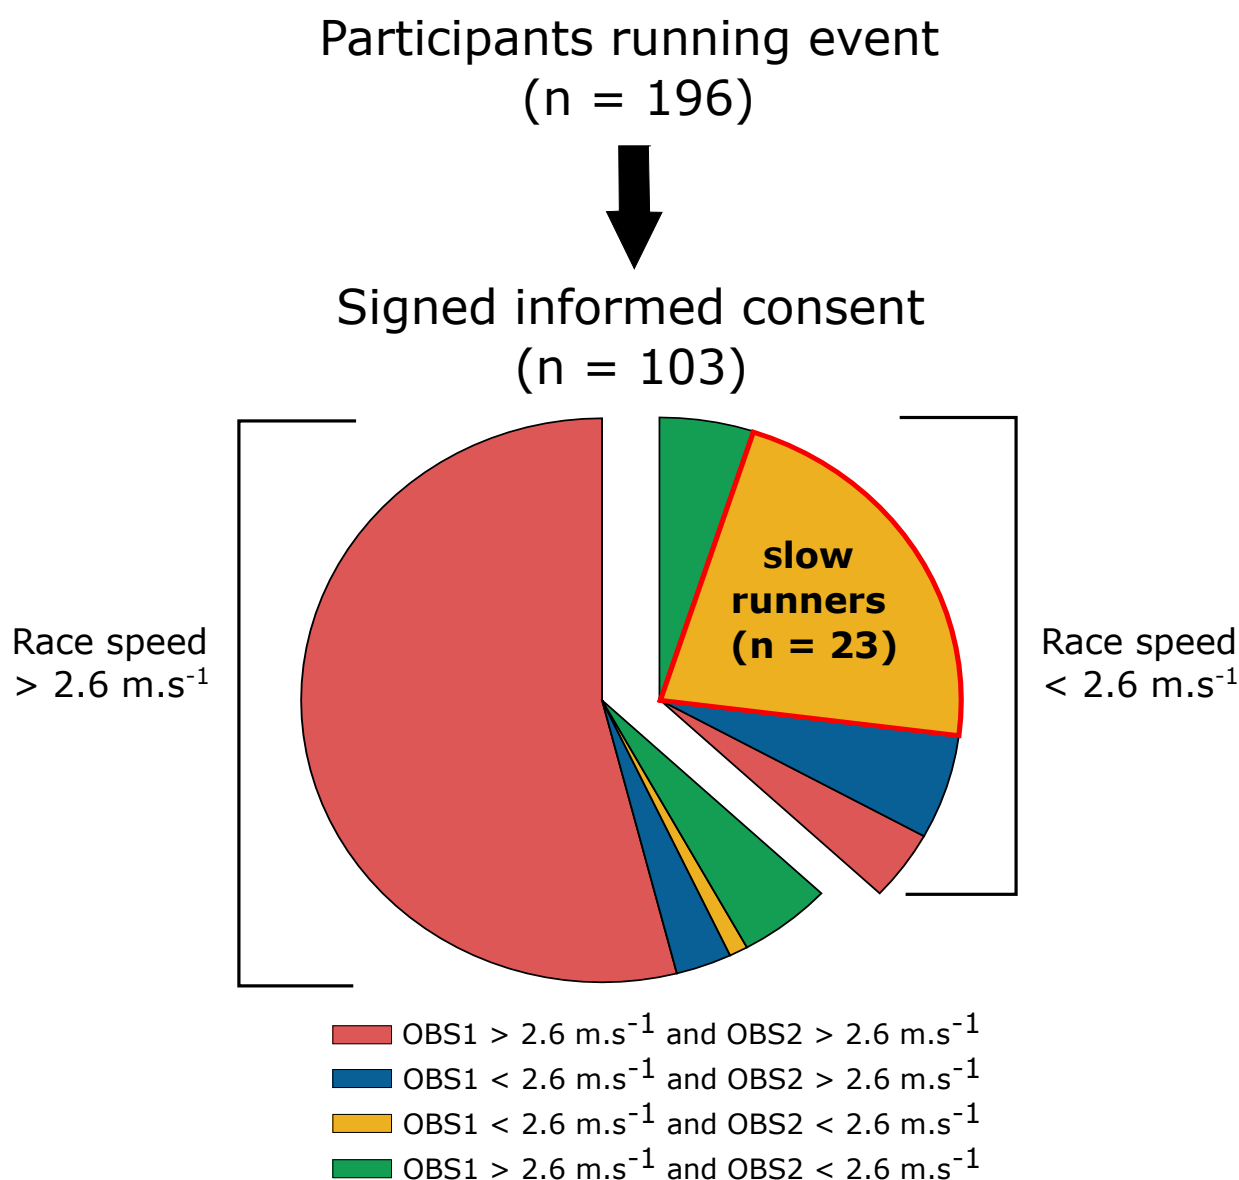

**Figure supplemental material 1: overview running population.** OBS1 and OBS2 stand for the instantaneous running speed at observation point 1 (0.91 km) and observation point 2 (4.66 km) respectively. Race speed is the average speed over the entire running event. Runners were categorized as slow runners if 1) their race speed was < 2.6 m.s<sup>-1</sup> and 2) if their instantaneous speed at both observation points was < 2.6 m.s<sup>-1</sup>.
