# Supplementary material for: Relationship between duty factor and external forces in slow recreational runners
Source: HighWire-hosted journal article supplement (doi:10.1136/bmjsem-2020-000996), 2021-03-01
Supplement: bmjsem-2020-000996supp002_data_supplement.pdf [file bmjsem-2020-000996supp002_data_supplement.pdf]

### Supplementary material 1.1

#### Abbreviations:

|        |                                        |
|--------|----------------------------------------|
| DF:    | duty factor                            |
| SF:    | stride frequency                       |
| FzMax: | maximal vertical ground reaction force |
| VILR:  | vertical instantaneous loading rate    |
| PBF:   | peak braking force                     |

The following table (table i) contains the results of the multiple linear regression analysis using a stepwise selection procedure for multiple speed steps (1.6, 1.8, 2.0 and 2.2 m.s<sup>-1</sup> for n = 14) with the independent variables DF and SF and the dependent variables FzMax, PBF and VILR. Only significant results are presented in the table. Figures in supplementary material 1.2 show the correlations (univariate R<sup>2</sup>-values are presented on top of each graph) between the independent variables (DF and SF) and the dependent variables (FzMax, PBF and VILR) for these speeds.

Table i: significant results of the multiple linear regression analysis at multiple speed steps.

|                  | R <sup>2</sup> -value | Duty factor |               | p-value |
|------------------|-----------------------|-------------|---------------|---------|
|                  |                       | B-value     | CI            |         |
| <b>Speed 1.6</b> |                       |             |               |         |
| FzMax            | 0.726                 | -0.033      | [-.045 -.020] | < 0.001 |
| <b>Speed 1.8</b> |                       |             |               |         |
| FzMax            | 0.725                 | -0.030      | [-.042 -.019] | < 0.001 |
| PBF              | 0.545                 | 0.003       | [.001 .005]   | 0.004   |
| <b>Speed 2.0</b> |                       |             |               |         |
| FzMax            | 0.768                 | -0.027      | [-.041 -.013] | 0.001   |
| PBF              | 0.668                 | 0.004       | [.002 .006]   | 0.001   |
| <b>Speed 2.2</b> |                       |             |               |         |
| FzMax            | 0.663                 | -0.036      | [-.052 -.020] | < 0.001 |
| PBF              | 0.426                 | 0.003       | [.001 .006]   | 0.016   |
