# Supplementary figures and images for: Relationship between duty factor and external forces in slow recreational runners
Source: HighWire-hosted journal article supplement (doi:10.1136/bmjsem-2020-000996), 2021-03-01

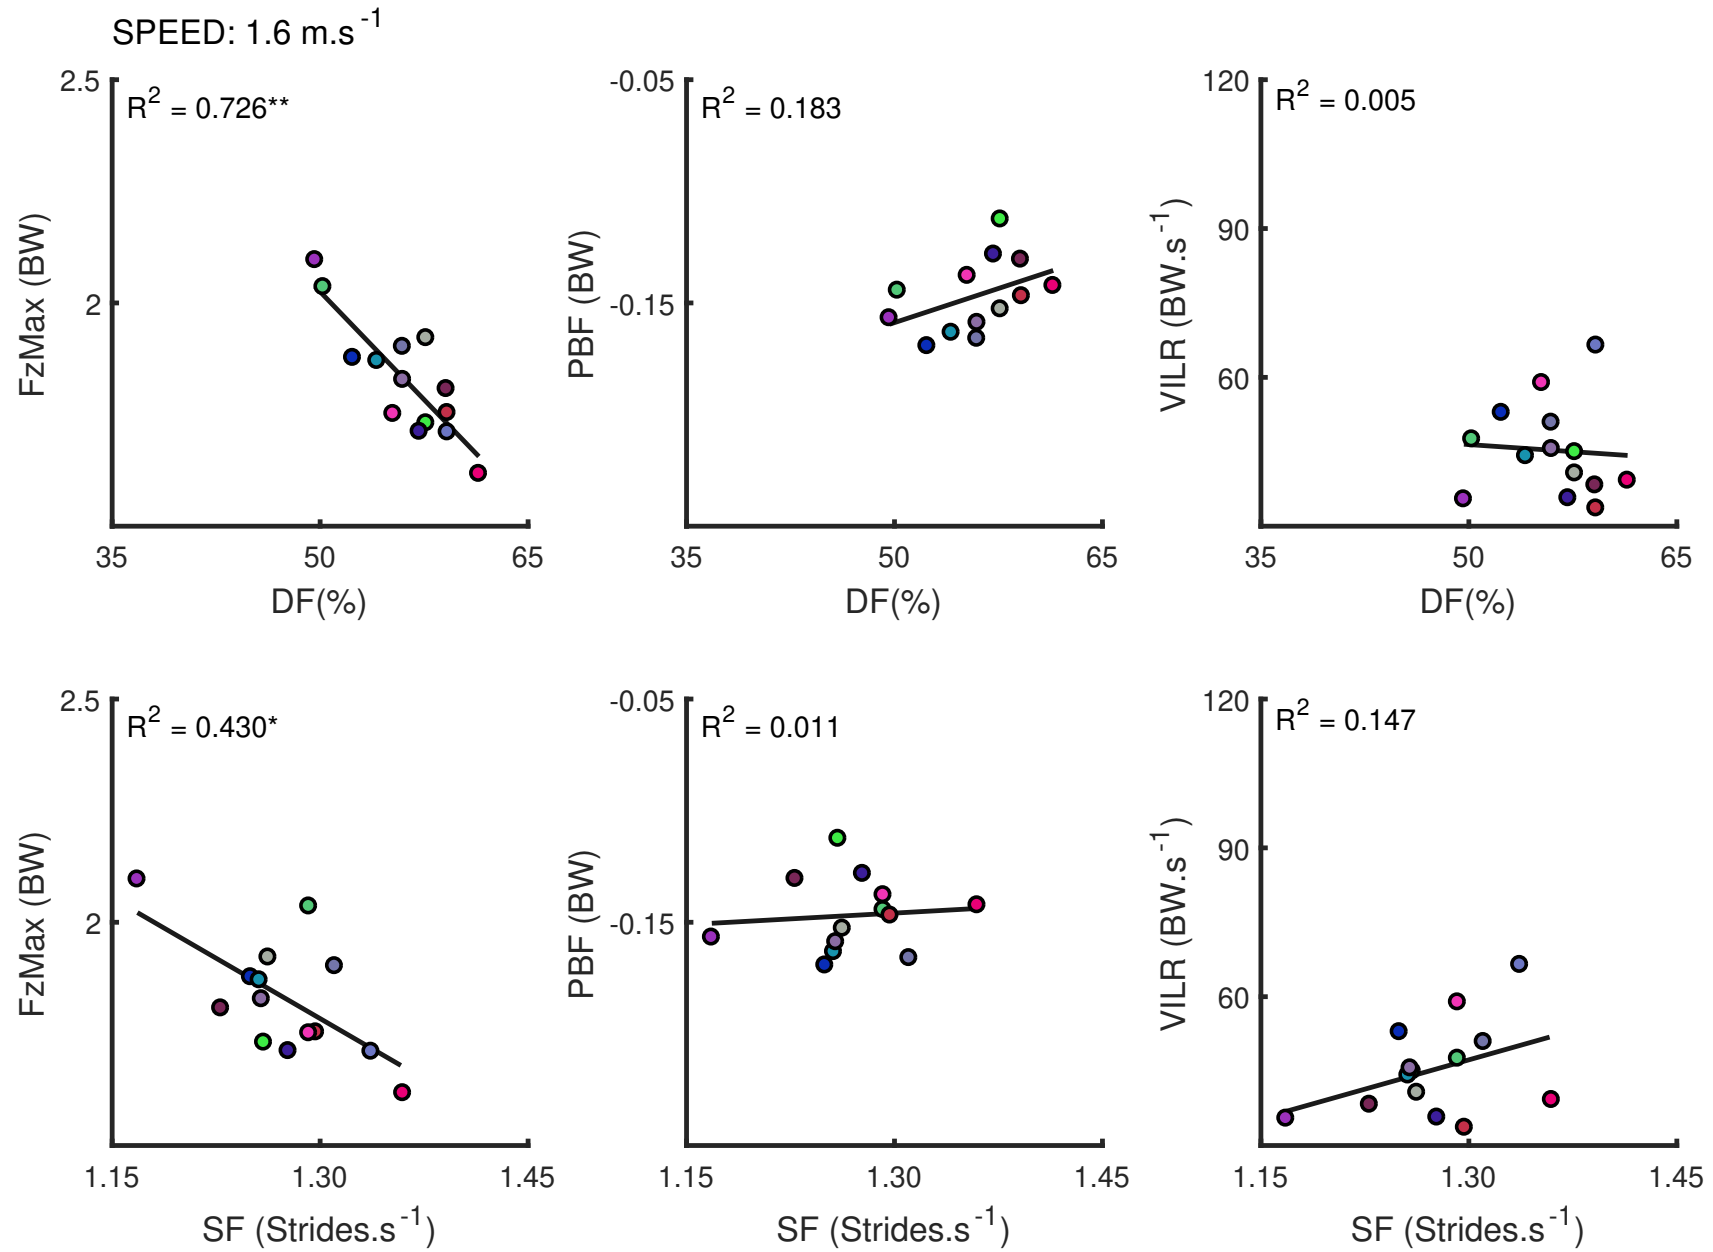

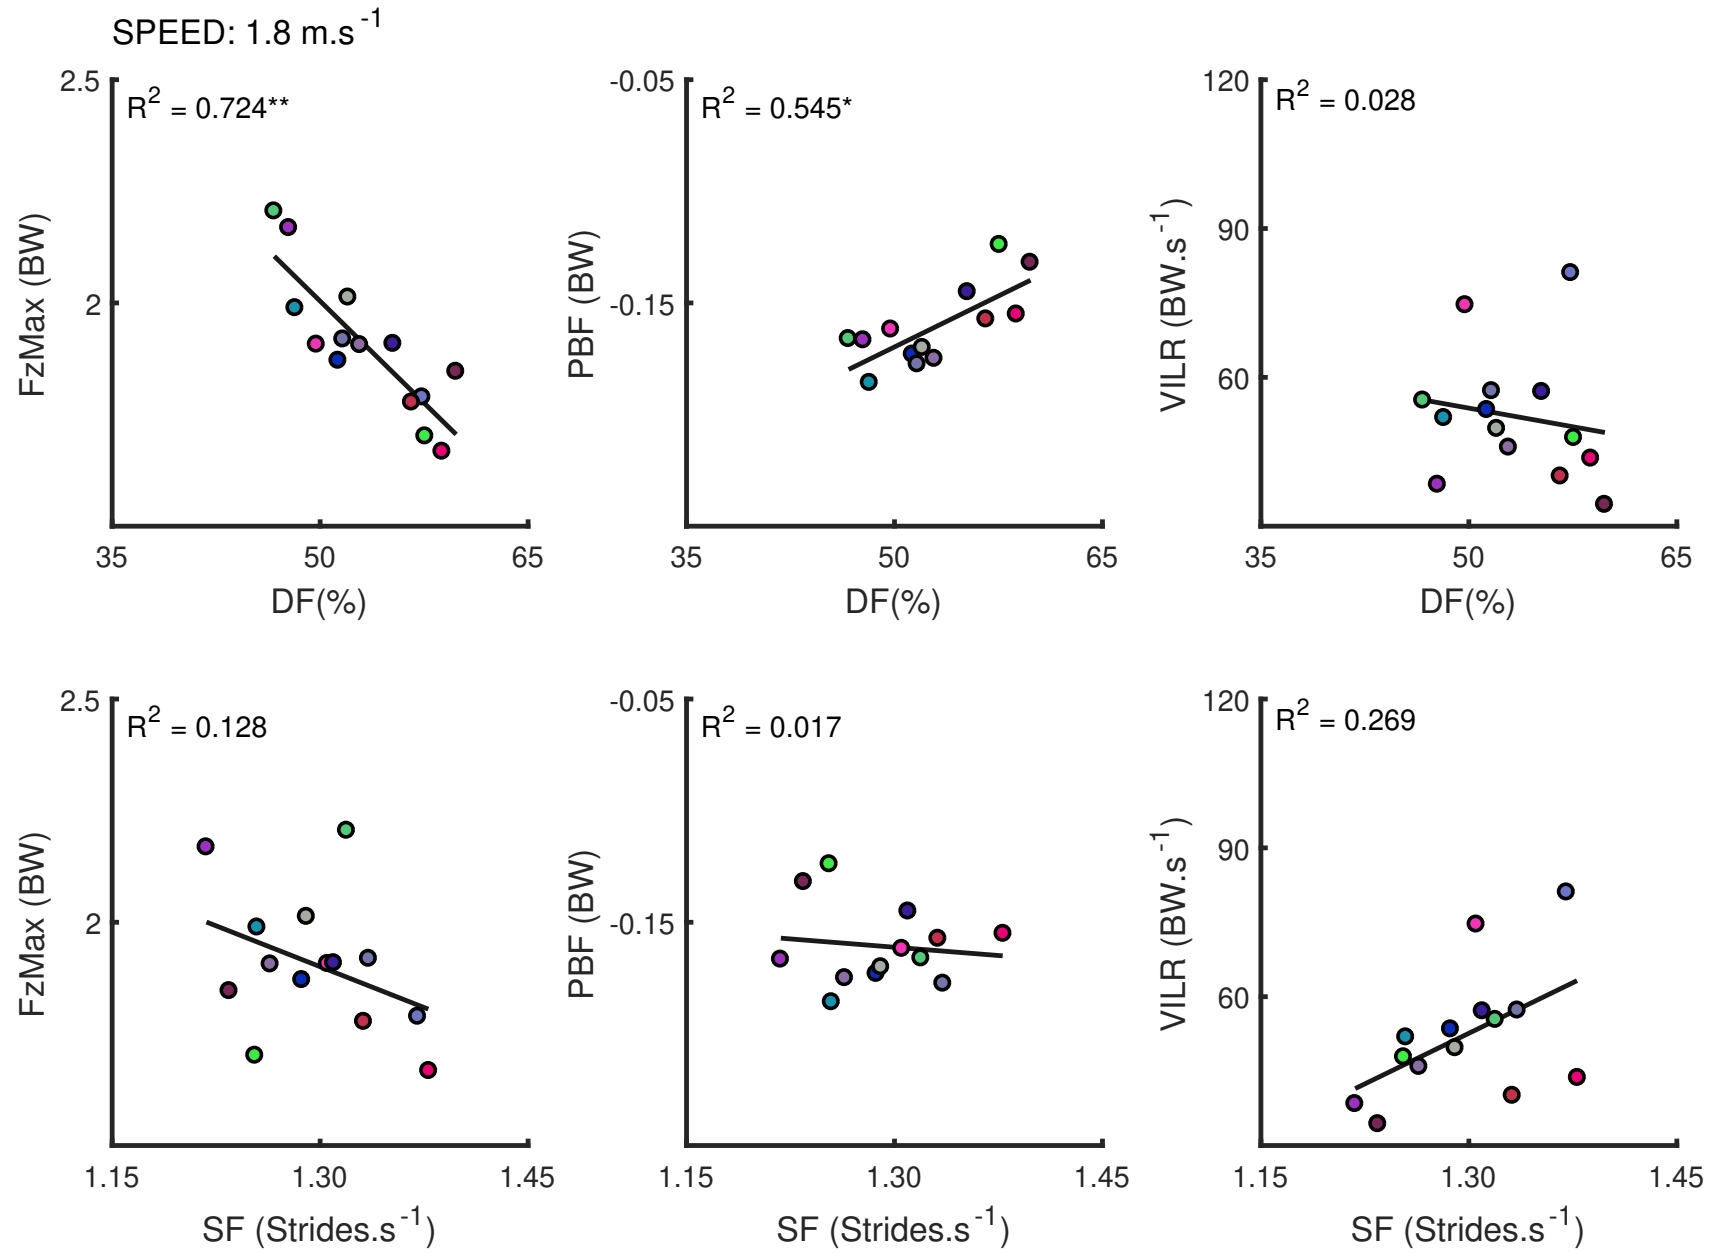

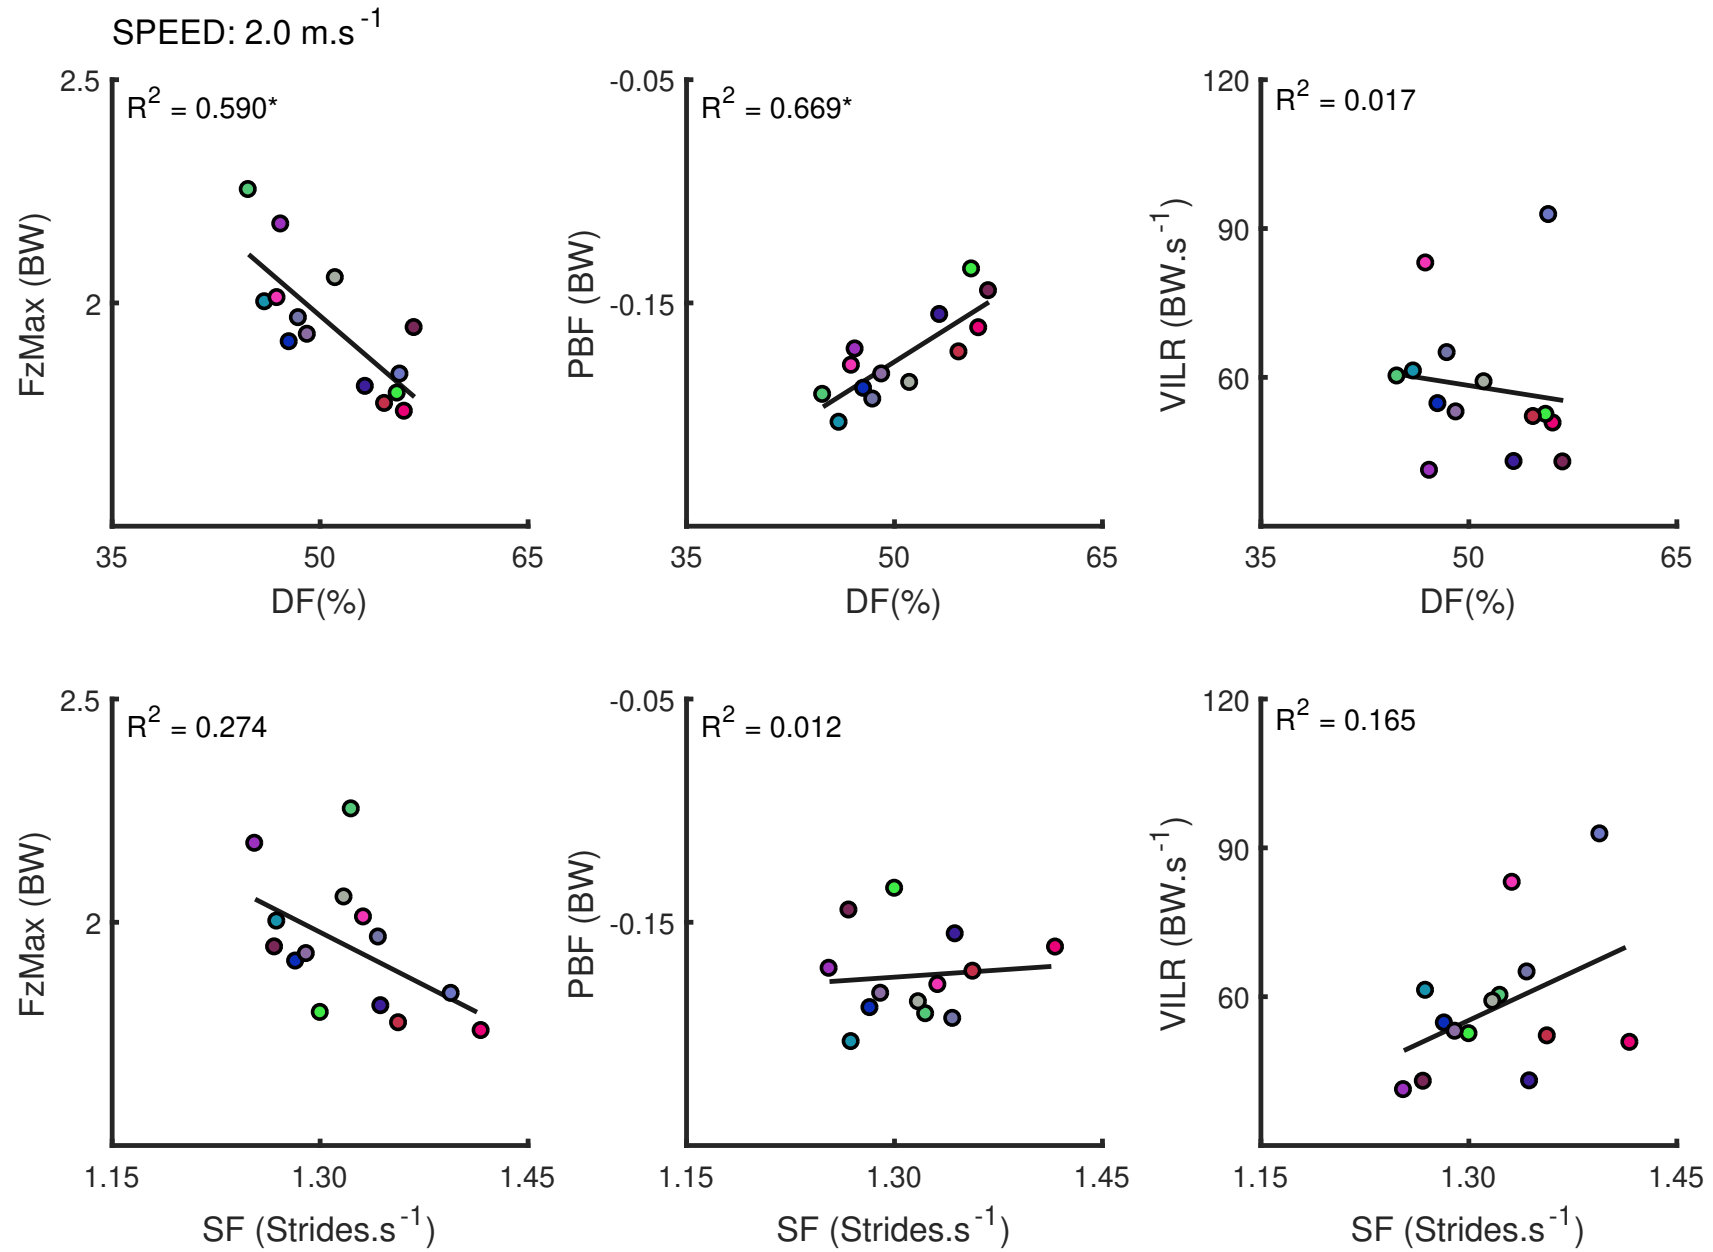

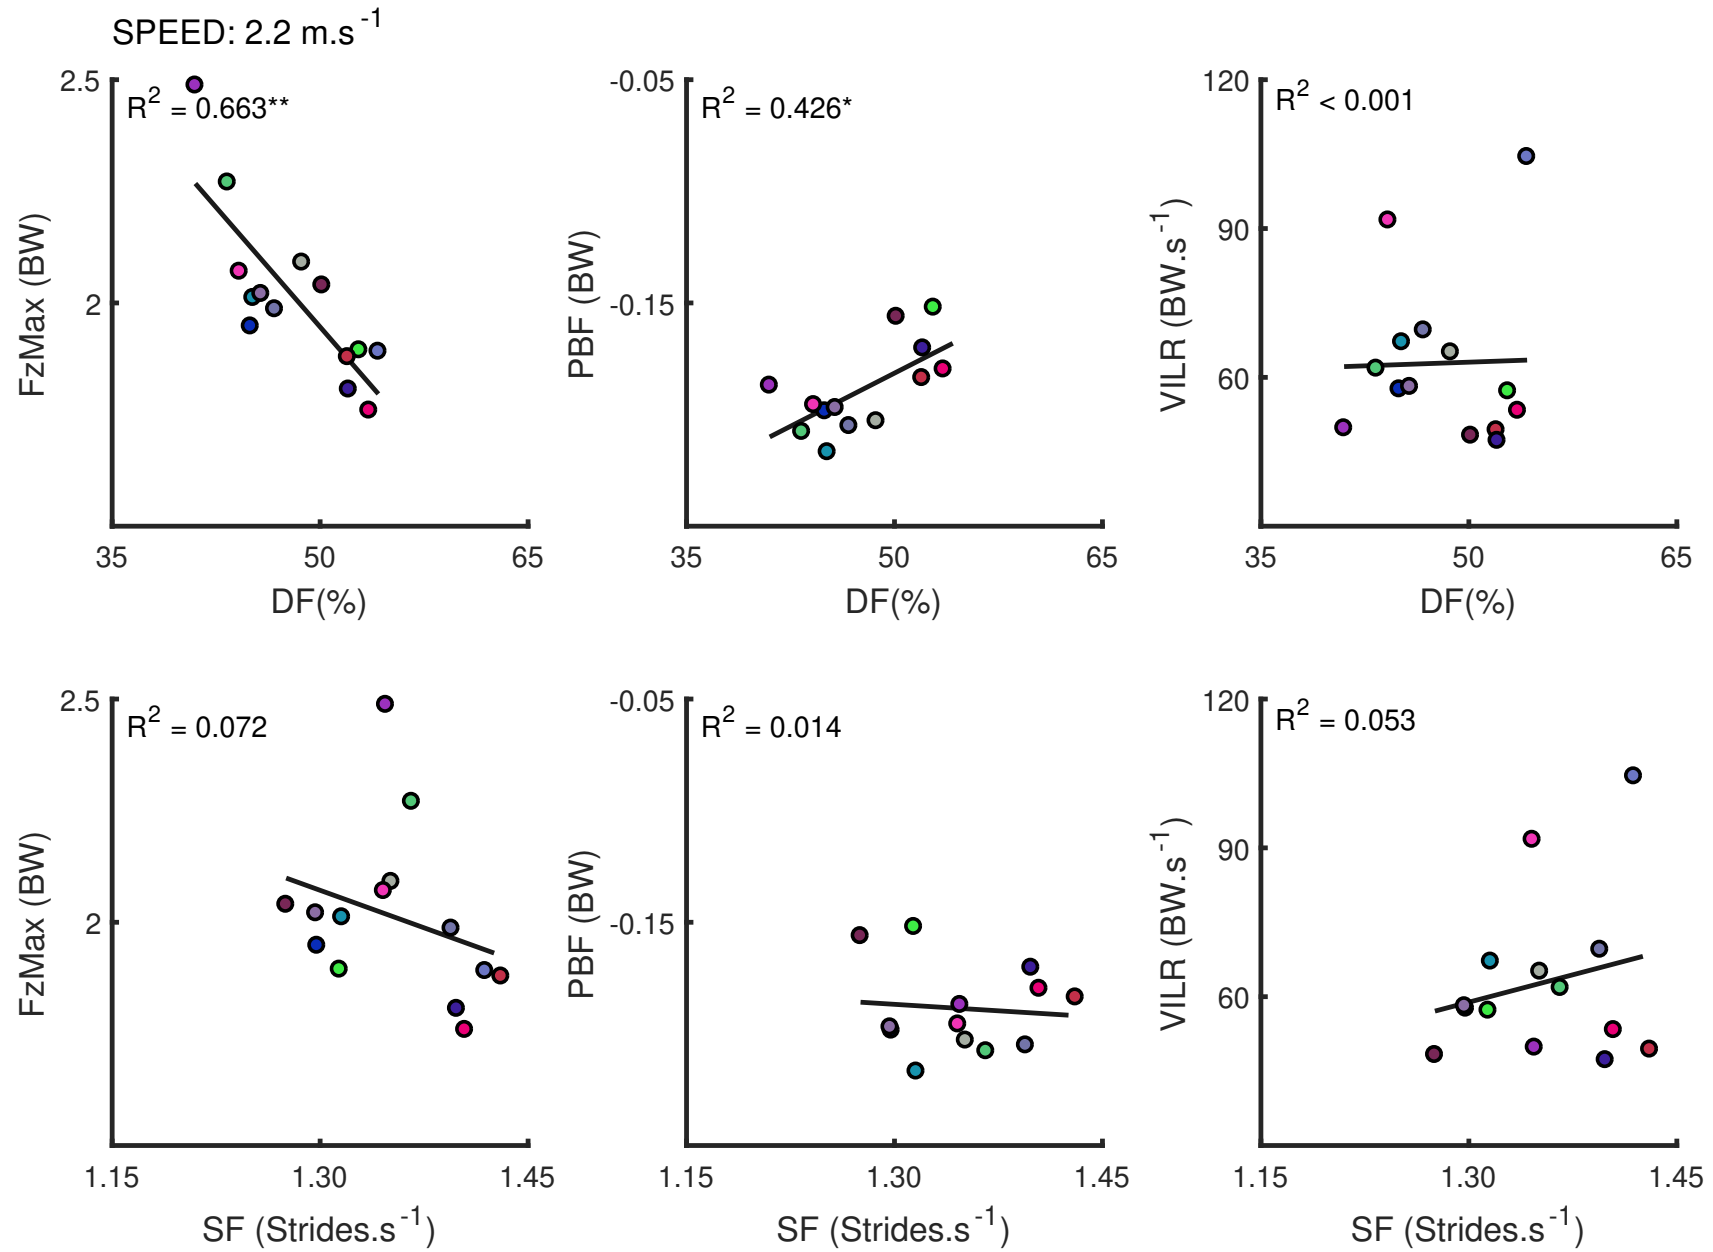

Supplement: bmjsem-2020-000996supp003_data_supplement.pdf [file bmjsem-2020-000996supp003_data_supplement.pdf]

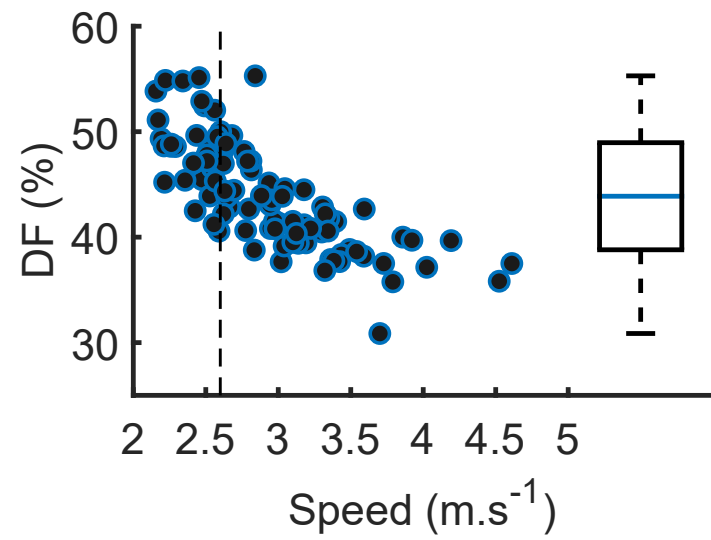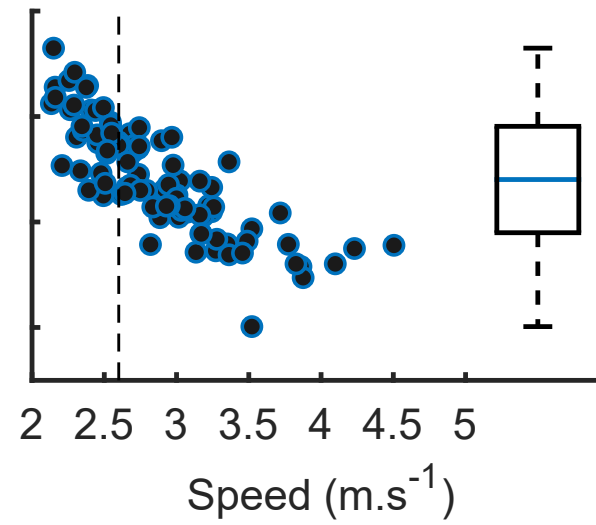

Supplement: bmjsem-2020-000996supp004_data_supplement.pdf [file bmjsem-2020-000996supp004_data_supplement.pdf]
